# Supplementary material for: Effect of climate on traits of dominant and rare tree species in the world’s forests
Source: Nat Commun. 2025 May 22;16:4773. doi: 10.1038/s41467-025-59754-7 (PMC12098762; doi:10.1038/s41467-025-59754-7)
Supplement: Supplementary file 4 — Supplementary Data 1 [file 41467_2025_59754_MOESM4_ESM.xlsx]

## Sheet: Data
Trait	Variable	Variable Importance	Regression coefficient	Std. Error	t value	p-value
Height	Biome	0.249654	-0.0718848	0.00309828	-23.2015	<0.001
Height	Temperature	0.18443	-0.0586435	0.00200619	-29.2313	<0.001
Height	Temperature2	0.0861433	-0.0378485	0.00252631	-14.9817	<0.001
Height	Aridity	0.16383	-0.0269039	0.00127726	-21.0638	<0.001
Height	Aridity2	0.0385449	0.0290309	0.00132824	21.8567	<0.001
Height	Elevation	0.0553724	0.0448055	0.00122666	36.5264	<0.001
Height	ForestAge	0.0932957	0.0468427	0.00577612	8.10972	<0.001
Height	Plotsize	0.0478267	0.0301622	0.00135686	22.2294	<0.001
Height	Temperature*Aridity	0.0573621	-0.063645	0.00135489	-46.9742	<0.001
Height	Temperature*Aridity2	0.0136221	0.013044	0.00046067	28.3153	<0.001
Height	Temperature2*Aridity	0.00156815	-0.0075047	0.00157947	-4.7514	<0.001
Height	Temperature2*Aridity2	0.0083499	0.017957	0.000917471	19.5722	<0.001
CrownDiameter	Biome	0.275034	-0.155804	0.00226251	-68.8634	<0.001
CrownDiameter	Temperature	0.108736	-0.0596203	0.00146501	-40.6961	<0.001
CrownDiameter	Temperature2	0.0795517	-0.0391784	0.00184483	-21.2369	<0.001
CrownDiameter	Aridity	0.0864898	0.00117636	0.000932712	1.26123	0.207226
CrownDiameter	Aridity2	0.0189064	0.0145549	0.000969943	15.0059	<0.001
CrownDiameter	Elevation	0.179619	0.0432035	0.000895765	48.2308	<0.001
CrownDiameter	ForestAge	0.166168	0.0248793	0.00421799	5.89837	<0.001
CrownDiameter	Plotsize	0.020349	0.00745023	0.000990846	7.51906	<0.001
CrownDiameter	Temperature*Aridity	0.010167	0.0180071	0.000989407	18.1999	<0.001
CrownDiameter	Temperature*Aridity2	0.00575463	-0.00541212	0.000336403	-16.0882	<0.001
CrownDiameter	Temperature2*Aridity	0.0437108	0.0568678	0.0011534	49.3043	<0.001
CrownDiameter	Temperature2*Aridity2	0.00551322	-0.00541678	0.00066998	-8.08499	<0.001
BarkThickness	Biome	0.392841	-0.0142568	0.00227133	-6.27683	<0.001
BarkThickness	Temperature	0.183607	-0.0281816	0.00147072	-19.1617	<0.001
BarkThickness	Temperature2	0.135353	0.0293454	0.00185202	15.8451	<0.001
BarkThickness	Aridity	0.0420835	-0.0205045	0.000936348	-21.8984	<0.001
BarkThickness	Aridity2	0.0214908	-0.0144498	0.000973724	-14.8397	<0.001
BarkThickness	Elevation	0.0618864	0.00853135	0.000899256	9.48712	<0.001
BarkThickness	ForestAge	0.0262913	0.00684409	0.00423443	1.61629	0.106031
BarkThickness	Plotsize	0.0803431	0.0377307	0.000994709	37.9314	<0.001
BarkThickness	Temperature*Aridity	0.00439799	0.00119917	0.000993264	1.2073	0.227316
BarkThickness	Temperature*Aridity2	0.0119814	0.00187318	0.000337714	5.54664	<0.001
BarkThickness	Temperature2*Aridity	0.0103256	0.000750455	0.0011579	0.648117	0.516909
BarkThickness	Temperature2*Aridity2	0.029399	0.0086078	0.000672592	12.798	<0.001
WoodDensity	Biome	0.384705	-0.43559	0.00377277	-115.456	<0.001
WoodDensity	Temperature	0.255739	0.0532286	0.00244293	21.7889	<0.001
WoodDensity	Temperature2	0.147634	-0.0833802	0.00307627	-27.1043	<0.001
WoodDensity	Aridity	0.0218332	0.0714543	0.00155531	45.9422	<0.001
WoodDensity	Aridity2	0.00646892	-0.0413255	0.00161739	-25.5507	<0.001
WoodDensity	Elevation	0.060596	0.0361614	0.0014937	24.2093	<0.001
WoodDensity	ForestAge	0.0510124	0.0131697	0.00703355	1.87241	0.0611501
WoodDensity	Plotsize	0.0140379	-0.00658463	0.00165225	-3.98525	<0.001
WoodDensity	Temperature*Aridity	0.00837885	-0.0296228	0.00164985	-17.9548	<0.001
WoodDensity	Temperature*Aridity2	0.00256898	0.0095371	0.000560956	17.0015	<0.001
WoodDensity	Temperature2*Aridity	0.0138115	0.00479167	0.00192332	2.49136	0.0127258
WoodDensity	Temperature2*Aridity2	0.0332136	-0.0446296	0.0011172	-39.9477	<0.001
SLA	Biome	0.273511	-0.21374	0.00378325	-56.4963	<0.001
SLA	Temperature	0.119322	0.0946199	0.00244972	38.6248	<0.001
SLA	Temperature2	0.314543	-0.0836886	0.00308482	-27.1291	<0.001
SLA	Aridity	0.0809798	0.0493704	0.00155963	31.6552	<0.001
SLA	Aridity2	0.0102523	-0.000684597	0.00162189	-0.422099	0.672953
SLA	Elevation	0.0602824	0.0156039	0.00149785	10.4175	<0.001
SLA	ForestAge	0.0394309	-0.022731	0.0070531	-3.22283	0.00126934
SLA	Plotsize	0.0317565	0.00835259	0.00165684	5.04128	<0.001
SLA	Temperature*Aridity	0.00606419	-0.00357677	0.00165443	-2.16193	0.0306241
SLA	Temperature*Aridity2	0.0020891	0.000529515	0.000562515	0.941335	0.346534
SLA	Temperature2*Aridity	0.0231954	0.0672197	0.00192866	34.853	<0.001
SLA	Temperature2*Aridity2	0.0385741	-0.0366335	0.0011203	-32.6996	<0.001
LeafN	Biome	0.295245	-0.252397	0.00363841	-69.3701	<0.001
LeafN	Temperature	0.0886815	0.0714945	0.00235593	30.3467	<0.001
LeafN	Temperature2	0.31878	-0.0627786	0.00296672	-21.1609	<0.001
LeafN	Aridity	0.1328	0.0269931	0.00149992	17.9964	<0.001
LeafN	Aridity2	0.0153906	0.0126512	0.00155979	8.11083	<0.001
LeafN	Elevation	0.0502409	-0.0117452	0.0014405	-8.15356	<0.001
LeafN	ForestAge	0.0205705	0.044852	0.00678307	6.61234	<0.001
LeafN	Plotsize	0.0250585	-0.0130547	0.00159341	-8.19293	<0.001
LeafN	Temperature*Aridity	0.0196729	0.0476589	0.00159109	29.9536	<0.001
LeafN	Temperature*Aridity2	0.0054005	-0.0122264	0.000540979	-22.6005	<0.001
LeafN	Temperature2*Aridity	0.0175966	0.082637	0.00185482	44.5525	<0.001
LeafN	Temperature2*Aridity2	0.0105625	-0.0263434	0.00107741	-24.4506	<0.001
LeafNP	Biome	0.475946	-0.10647	0.00201976	-52.714	<0.001
LeafNP	Temperature	0.0250728	0.0329804	0.00130783	25.2177	<0.001
LeafNP	Temperature2	0.176056	-0.0165743	0.00164689	-10.064	<0.001
LeafNP	Aridity	0.13343	0.0325103	0.000832638	39.0449	<0.001
LeafNP	Aridity2	0.0164857	-0.00377948	0.000865874	-4.36493	<0.001
LeafNP	Elevation	0.00279885	-0.0796722	0.000799655	-99.6332	<0.001
LeafNP	ForestAge	0.0877791	0.0189933	0.00376543	5.04413	<0.001
LeafNP	Plotsize	0.027987	-0.000548242	0.000884535	-0.619809	0.535384
LeafNP	Temperature*Aridity	0.0249138	0.0398961	0.00088325	45.1697	<0.001
LeafNP	Temperature*Aridity2	0.00871881	-0.0107203	0.000300309	-35.6977	<0.001
LeafNP	Temperature2*Aridity	0.00634838	0.0284468	0.00102965	27.6276	<0.001
LeafNP	Temperature2*Aridity2	0.0144638	-0.0215547	0.000598096	-36.039	<0.001
StemConduitDiam	Biome	0.366372	-0.270202	0.00378862	-71.3195	<0.001
StemConduitDiam	Temperature	0.0692603	0.0563184	0.00245319	22.9572	<0.001
StemConduitDiam	Temperature2	0.26856	-0.0449265	0.0030892	-14.5431	<0.001
StemConduitDiam	Aridity	0.127038	0.0283556	0.00156184	18.1552	<0.001
StemConduitDiam	Aridity2	0.0157824	0.0252373	0.00162419	15.5384	<0.001
StemConduitDiam	Elevation	0.0620727	0.0146574	0.00149997	9.77178	<0.001
StemConduitDiam	ForestAge	0.022644	0.0353054	0.00706311	4.99857	<0.001
StemConduitDiam	Plotsize	0.0383892	0.00384787	0.00165919	2.31912	0.0203885
StemConduitDiam	Temperature*Aridity	0.0120959	0.0221957	0.00165678	13.3969	<0.001
StemConduitDiam	Temperature*Aridity2	0.00181999	-0.00465412	0.000563313	-8.26206	<0.001
StemConduitDiam	Temperature2*Aridity	0.00772685	0.0447927	0.0019314	23.1919	<0.001
StemConduitDiam	Temperature2*Aridity2	0.00823912	-0.0208309	0.00112189	-18.5676	<0.001
RootDepth	Biome	0.349419	-0.12253	0.00211249	-58.0025	<0.001
RootDepth	Temperature	0.149188	0.0262036	0.00136787	19.1564	<0.001
RootDepth	Temperature2	0.18439	0.0459794	0.0017225	26.6934	<0.001
RootDepth	Aridity	0.15165	0.00557745	0.000870866	6.40448	<0.001
RootDepth	Aridity2	0.0252197	-0.000318497	0.000905629	-0.351686	0.725074
RootDepth	Elevation	0.0332119	-0.00106514	0.000836369	-1.27353	0.20283
RootDepth	ForestAge	0.0257653	0.111946	0.00393831	28.4249	<0.001
RootDepth	Plotsize	0.0168445	-0.0260644	0.000925146	-28.1733	<0.001
RootDepth	Temperature*Aridity	0.0495942	0.0381596	0.000923803	41.3071	<0.001
RootDepth	Temperature*Aridity2	0.00725939	-0.00153408	0.000314097	-4.8841	<0.001
RootDepth	Temperature2*Aridity	0.00537411	0.0014482	0.00107693	1.34476	0.178704
RootDepth	Temperature2*Aridity2	0.00208289	-0.00513432	0.000625556	-8.20761	<0.001
SeedMass	Biome	0.347368	-0.355673	0.00363089	-97.9574	<0.001
SeedMass	Temperature	0.190193	-0.0141088	0.00235106	-6.00103	<0.001
SeedMass	Temperature2	0.172384	-0.0400701	0.00296059	-13.5345	<0.001
SeedMass	Aridity	0.0347101	0.0180913	0.00149682	12.0865	<0.001
SeedMass	Aridity2	0.00824624	-0.0376579	0.00155657	-24.1929	<0.001
SeedMass	Elevation	0.065094	-0.0748157	0.00143753	-52.0447	<0.001
SeedMass	ForestAge	0.0488719	0.109406	0.00676906	16.1627	<0.001
SeedMass	Plotsize	0.0227825	0.0205576	0.00159011	12.9284	<0.001
SeedMass	Temperature*Aridity	0.0770913	0.0808596	0.00158781	50.9254	<0.001
SeedMass	Temperature*Aridity2	0.0146971	-0.016919	0.000539861	-31.3395	<0.001
SeedMass	Temperature2*Aridity	0.0135818	0.0237088	0.00185099	12.8087	<0.001
SeedMass	Temperature2*Aridity2	0.00498056	-0.0112761	0.00107519	-10.4876	<0.001
Gymnosperm	Biome	0.39119	0.306261	0.00411861	74.3602	<0.001
Gymnosperm	Temperature	0.0728476	-0.0443799	0.00266687	-16.6412	<0.001
Gymnosperm	Temperature2	0.233304	0.110149	0.00335827	32.7991	<0.001
Gymnosperm	Aridity	0.115291	-0.0507649	0.00169788	-29.8989	<0.001
Gymnosperm	Aridity2	0.0156388	-0.0243626	0.00176566	-13.7981	<0.001
Gymnosperm	Elevation	0.0593379	-0.0225421	0.00163062	-13.8242	<0.001
Gymnosperm	ForestAge	0.0283509	-0.0641505	0.00767831	-8.35476	<0.001
Gymnosperm	Plotsize	0.0375853	-0.00671712	0.00180371	-3.72406	<0.001
Gymnosperm	Temperature*Aridity	0.0180951	-0.0409415	0.00180109	-22.7315	<0.001
Gymnosperm	Temperature*Aridity2	0.00267171	0.00801006	0.000612378	13.0802	<0.001
Gymnosperm	Temperature2*Aridity	0.0132996	-0.0851102	0.00209963	-40.5359	<0.001
Gymnosperm	Temperature2*Aridity2	0.0123878	0.034667	0.00121961	28.4246	<0.001
pc1	Biome	0.385965	0.553401	0.00674444	82.053	<0.001
pc1	Temperature	0.0829625	-0.137585	0.00436713	-31.5047	<0.001
pc1	Temperature2	0.271935	0.112195	0.00549934	20.4016	<0.001
pc1	Aridity	0.111399	-0.0986639	0.00278037	-35.4859	<0.001
pc1	Aridity2	0.0144829	-0.00269374	0.00289135	-0.931655	0.351515
pc1	Elevation	0.0458352	0.0306148	0.00267023	11.4652	<0.001
pc1	ForestAge	0.0131393	-0.0640305	0.0125736	-5.09245	<0.001
pc1	Plotsize	0.0303225	0.011712	0.00295366	3.96523	<0.001
pc1	Temperature*Aridity	0.0150544	-0.0586949	0.00294937	-19.9008	<0.001
pc1	Temperature*Aridity2	0.00248046	0.0109169	0.0010028	10.8864	<0.001
pc1	Temperature2*Aridity	0.00862299	-0.0903515	0.00343824	-26.2784	<0.001
pc1	Temperature2*Aridity2	0.0178012	0.0662118	0.00199718	33.1527	<0.001
pc2	Biome	0.17686	-0.187229	0.00373882	-50.077	<0.001
pc2	Temperature	0.440006	-0.0862729	0.00242094	-35.636	<0.001
pc2	Temperature2	0.0309966	0.0157856	0.00304859	5.178	<0.001
pc2	Aridity	0.0197494	-0.0226389	0.00154131	-14.6881	<0.001
pc2	Aridity2	0.00724968	-0.0053687	0.00160284	-3.3495	<0.001
pc2	Elevation	0.109569	-0.00221886	0.00148026	-1.49897	0.133882
pc2	ForestAge	0.0766295	0.165288	0.00697026	23.7133	<0.001
pc2	Plotsize	0.0307933	0.0152897	0.00163738	9.33791	<0.001
pc2	Temperature*Aridity	0.0659928	0.0367734	0.001635	22.4913	<0.001
pc2	Temperature*Aridity2	0.00929727	-0.0043486	0.000555908	-7.82251	<0.001
pc2	Temperature2*Aridity	0.00781774	0.0102501	0.00190601	5.37777	<0.001
pc2	Temperature2*Aridity2	0.0250385	0.0132008	0.00110715	11.9233	<0.001

## Sheet: Legend
Supplementary Data 1. Regression coefficients and variable importance of the independent variables, evaluated with linear models. To quantify the relative importance of temperature, water availability index (WAI), their interaction, forest age, plot size, elevation and biome on trait differences, we used the scaled calc.relimp function in R (Grömping, 2006). This function evaluates the contributi…
